# Supplementary material for: Investigating Unhealthy Behaviors Associated with SF-36 Domains in Women with Endometriosis—Findings from a Web-Based Survey Data Set
Source: MDPI journal article supplement (doi:10.3390/bs14030199), 2024-03-01
Supplement: s1 [file s1]

## Qualità dell'assistenza e percezione della qualità della vita nelle donne con endometriosi in era Covid

Il presente questionario è destinato a Donne con età  $\geq 18$  anni, con diagnosi di endometriosi

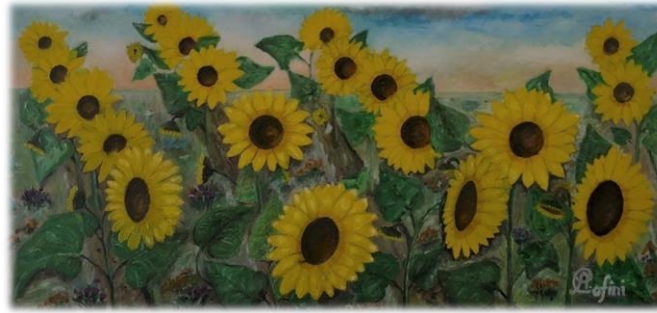

*Gentile Signora,*

*Le proponiamo di partecipare ad un'indagine per valutare l'impatto della Pandemia Covid-19 sulla qualità dell'assistenza ricevuta e sulla qualità della vita delle donne con diagnosi di endometriosi, ad un anno dall'inizio della Pandemia. A tale scopo Le chiediamo la disponibilità di 10 minuti circa, invitandola a rispondere ad un questionario online anonimo. I dati raccolti saranno trattati secondo la normativa vigente per la tutela della privacy, saranno elaborati in forma aggregata non riconducibile ad alcun partecipante e saranno utilizzati per lavori scientifici. La invitiamo pertanto a dare il suo consenso dopo aver letto il foglio informativo sullo studio e la nota informativa sul trattamento dei dati. Potrà interrompere la sua partecipazione in qualsiasi momento, senza bisogno di fornire alcuna spiegazione ottenendo così il NON utilizzo dei dati*

### **Dati anagrafici**

D1 – Anni compiuti \*

---

D2- Nazionalità \*

- ☐ Italiana
- ☐ Altro \_\_\_\_\_

D3 – Comune di residenza \*

---

D4 – Provincia \*

Indicare la sigla con lettere maiuscole

---

D5 - Regione di provenienza \*

- ☐ Abruzzo
- ☐ Basilicata
- ☐ Calabria
- ☐ Campania
- ☐ Emilia-Romagna
- ☐ Friuli Venezia Giulia
- ☐ Lazio
- ☐ Liguria
- ☐ Lombardia
- ☐ Marche
- ☐ Molise
- ☐ Piemonte
- ☐ Puglia
- ☐ Sardegna
- ☐ Sicilia
- ☐ Toscana
- ☐ Trentino-Alto Adige

- ☐ Umbria
- ☐ Valle d'Aosta
- ☐ Veneto

D6 - Stato civile \*

- ☐ Coniugata
- ☐ Nubile
- ☐ Vedova
- ☐ Divorziata
- ☐ Convivente

D7 - Vive da sola? \*

- ☐ Sì
- ☐ No

D8 - Se no, con quante altre persone (oltre Lei)?

---

D9 - Titolo di studio \*

- ☐ Licenza elementare
- ☐ Licenza media
- ☐ Diploma
- ☐ Laurea
- ☐ Post laurea

D10 - Indichi la Sua altezza \*

Esprimere l'altezza in cm riportando solo il numero (esempio 165)

---

D11 - Indichi il Suo peso \*

Indicare il peso in kg riportando solo il numero (esempio 60)

---

D12 - Attualmente ha una occupazione? \*

- ☐ Sì, a tempo indeterminato
- ☐ Sì, a tempo determinato
- ☐ No, sono disoccupata
- ☐ No, sono una studentessa
- ☐ No, sono casalinga
- ☐ No, sono pensionata

D13 - Svolge attività fisica? \*

- ☐ Sì, attività fisica moderata
- ☐ Sì, attività fisica intensa
- ☐ No, non svolgo attività fisica attualmente
- ☐ Non ho mai svolto attività fisica nella mia vita

D14 - Ha avuto una o più gravidanze? \*

- ☐ Sì, in passato
- ☐ Sì, sono attualmente in attesa
- ☐ No
- ☐ Altro: \_\_\_\_\_

D15 - Abitudine al fumo: attualmente Lei: \*

- ☐ Fuma sigarette (tabacco)
- ☐ Fuma sigaretta elettronica
- ☐ No, ma ha fumato in passato
- ☐ No, non ha mai fumato

D16 - Le capita di bere una unità alcolica (1 bicchiere di birra o 1 bicchiere di vino o un superalcolico)? \*

- ☐ Sì, solo durante i pasti (Passa alla domanda D16.1)
- ☐ Sì, prevalentemente durante i pasti (Passa alla domanda D16.1)
- ☐ Sì, prevalentemente fuori dai pasti (Passa alla domanda D16.1)
- ☐ Sì, solo fuori dai pasti (Passa alla domanda D16.1)
- ☐ Non bevo alcolici (Passa alla domanda D17)

D16.1 - In un giorno quante unità alcoliche (1 bicchiere di birra o 1 bicchiere di vino o un superalcolico) mediamente beve? \*

D16.1.1 Quando le capita di bere, quante unità alcoliche (1 bicchiere di birra o 1 bicchiere di vino o un superalcolico) consuma nella stessa occasione?

### **Qualità dell'assistenza ricevuta**

D17 - A che età ha saputo di avere l'endometriosi? \*

D18 - Dopo quanti anni dalla comparsa dei sintomi ha avuto la diagnosi? (se è avvenuta dopo mesi indichi zero anni) \*

- ☐ 0
- ☐ 1
- ☐ 2
- ☐ 3
- ☐ 4
- ☐ 5
- ☐ 6
- ☐ 7
- ☐ 8
- ☐ 9
- ☐ 10
- ☐ più di 10
- ☐ Non ho mai avuto sintomi

D19 - È mai stata visitata da centri/medici specializzati in endometriosi? \*

- ☐ Sì (Passa alla domanda D19.1)
- ☐ No (Passa alla domanda D20)
- ☐ Non ricordo/non so (Passa alla domanda D20).

### Centri/medici specializzati in endometriosi

D19.1 - Questi centri/medici sono \*

*Seleziona tutte le voci applicabili.*

- ☐ Pubblici
- ☐ Privati convenzionati
- ☐ Privati

D19.2 - Negli ultimi 12 mesi quante volte è stata visitata presso questi centri/medici? (Indichi un numero) \*

Inserire in "Altro" il numero di volte, riportando solo il numero (esempio: 2) *(una sola risposta)*

- ☐ Mai (Passa alla domanda D20).
- ☐ Altro: \_\_\_\_\_

### Visite negli ultimi 12 mesi in centri/medici specializzati

D19.3 - In una di queste visite, è stata visitata in maniera approfondita, con ecografia e visita ginecologica? \*

- ☐ Sì
- ☐ No
- ☐ Non ricordo/non so

D19.4 - Se sì, quando è stata l'ultima volta che è stata visitata in tale maniera?

- ☐ Negli ultimi 6 mesi
- ☐ Più di 6 mesi fa
- ☐ Non ricordo

D20 - Negli ultimi 12 mesi quante volte ha visto il Suo medico di famiglia per motivi legati all'endometriosi? \*

Inserire in "Altro" il numero di volte, riportando solo il numero (esempio: 2) *(una sola risposta)*.

- ☐ Mai (Passa alla domanda D21).
- ☐ Altro: \_\_\_\_\_

D20.1 Quanto si ritiene soddisfatta dell'assistenza ricevuta dal Suo medico di famiglia da 0 a 5?

(0=molto insoddisfatta, 1=insoddisfatta, 2=discretamente soddisfatta, 4=soddisfatta, 5=molto soddisfatta) \*

Risponda a questa domanda soltanto se negli ultimi 12 mesi si è recata dal Suo medico di famiglia. *(una sola risposta)*.

- ☐ 1
- ☐ 2
- ☐ 3
- ☐ 4
- ☐ 5

D21 - Negli ultimi 12 mesi è stata visitata da qualche specialista per problematiche correlate all'endometriosi? \*

- ☐ Sì (Passa alla domanda D21.1)
- ☐ No (Passa alla domanda D22)
- ☐ Non ricordo (Passa alla domanda D22)

D21.1 - Quale specialista l'ha visitata negli ultimi 12 mesi per problematiche correlate con l'endometriosi? \*

Può scegliere una o più risposte

*Seleziona tutte le voci applicabili.*

- ☐ Endocrinologo
- ☐ Gastroenterologo
- ☐ Proctologo
- ☐ Urologo
- ☐ Radiologo
- ☐ Algologo (terapia del dolore)
- ☐ Fisiatra
- ☐ Fisioterapista
- ☐ Sessuologo
- ☐ Psicologo
- ☐ Nutrizionista
- ☐ Altro: \_\_\_\_\_

D21.1.1 Aggiunga eventuali altri specialisti che l'hanno visitata negli ultimi 12 mesi per problematiche correlate all'endometriosi

\_\_\_\_\_

D21.2 - Chi l'ha inviata dallo specialista? \*

Può scegliere una o più risposte

*Seleziona tutte le voci applicabili.*

- ☐ Altro specialista

- ☐ Medico di famiglia
- ☐ Ha preso Lei l'iniziativa

D22 - Negli ultimi 12 mesi è stata ricoverata in ospedale per problematiche legate all'endometriosi, escluso il day hospital? \*

- ☐ Sì
- ☐ No
- ☐ Non ricordo

Vorremmo farLe ora qualche domanda sugli esami e farmaci che Le sono stati prescritti o consigliati dal Suo medico o dal centro per l'endometriosi e domande sugli interventi chirurgici.

D23 - Attualmente, assume farmaci, prescritti o consigliati dal Suo ginecologo, per la terapia dell'endometriosi (quali pillola estroprogestinica, pillola progestinica, analoghi del GNRH)? \*

- ☐ Sì
- ☐ No

D24 - Assume altri farmaci non prescritti o consigliati da un medico, per problematiche correlate all'endometriosi? \*  
Può selezionare più di una risposta

- ☐ Sì, antidolorifici
- ☐ Sì, integratori
- ☐ Sì, prodotti omeopatici
- ☐ No, assunto soltanto i farmaci prescritti o consigliati dal mio ginecologo
- ☐ No, non assumo alcun farmaco
- ☐ Altro: \_\_\_\_\_

D25 - Presenta una o più delle seguenti complicanze, dovute all'endometriosi? \*  
Può selezionare una o più risposte. Aggiungere in "altro" ulteriori, eventuali, complicanze.

- ☐ Non presento complicanze
- ☐ Dolore pelvico cronico
- ☐ Dispareunia (dolore durante i rapporti)
- ☐ Problemi al pavimento pelvico
- ☐ Necessità di autocateterismi
- ☐ Neuropatia/problemi ai nervi
- ☐ Infertilità
- ☐ Isterectomia
- ☐ Salpingectomia
- ☐ Ovariectomia
- ☐ Stenosi intestinale
- ☐ Resezione intestinale
- ☐ Stomia intestinale/urostomia
- ☐ Resezione vescicale
- ☐ Sindrome aderenziale
- ☐ Altro:

D25.1 Aggiungere ulteriori, eventuali, complicanze

\_\_\_\_\_

D26 - Ha mai subito un intervento chirurgico per endometriosi e/o per complicanze correlate all'endometriosi? \*

- ☐ Sì (Passa alla domanda D26.1)
- ☐ No (Passa alla domanda D27)

D26.1 - Che tipo di intervento? \*

Può barrare più risposte se ha subito più interventi.

- ☐ Laparoscopia diagnostica (per confermare o escludere la patologia)
- ☐ Laparoscopia operativa (per effettuare un trattamento. Esempio rimozione di cisti, lisi di aderenze, ecc)
- ☐ Laparotomia
- ☐ Non ricordo
- ☐ Altro: \_\_\_\_\_

Vorremmo chiederLe se ha ricevuto informazioni sui Suoi diritti come malata di endometriosi

D27 - È stata informata sulle agevolazioni cui ha diritto una paziente affetta da endometriosi (per le pazienti negli stadi clinici più avanzati cioè “moderato o III grado” e “grave o IV grado” è riconosciuto il diritto ad usufruire di un’esenzione per alcune prestazioni specialistiche di controllo)? \*

--

- ☐ Sì (Passa alla domanda D27.1)
- ☐ No (Passa alla domanda D28)
- ☐ Non ricordo (Passa alla domanda D28).

D27.1 - Da chi ha ricevuto l'informazione? \*

Può barrare più risposte

- ☐ Dal medico di famiglia
- ☐ Dal centro/medico specializzato in endometriosi
- ☐ Da associazioni di persone con endometriosi
- ☐ Da familiari, amici
- ☐ Da altre fonti (addetti del distretto o ASL, farmacisti, giornalisti, radio, televisione, pubblicità, ecc)
- ☐ Non ricordo

Le domande che seguono si riferiscono alla struttura che l'ha seguita più da vicino.

D28 - Negli ultimi 12 mesi, quale struttura ha seguito più da vicino la Sua malattia? \*

- ☐ Centro specifico o medico specializzato in endometriosi (Passa alla domanda D28.1)
- ☐ Ambulatorio del medico di famiglia (Passa alla domanda D28.1)
- ☐ Nessuna struttura (Passa alla domanda D28.1a)
- ☐ Altro: \_\_\_\_\_ (Passa alla domanda D28.1)

Struttura che ha seguito più da vicino la Sua malattia

D28.1 - Come ritiene che siano gli orari della struttura? \*

- ☐ Ottimi
- ☐ Adeguati
- ☐ Appena adeguati
- ☐ Non adeguati

D28.2 - Quanto sono accessibili i locali dove viene visitata, per esempio barriere architettoniche, mancanza di un ascensore, scalini, molto da camminare, ecc.? \*

- ☐ Molto accessibili
- ☐ Abbastanza accessibili
- ☐ Accessibilità con una certa difficoltà
- ☐ Poco accessibili

D28.3 - Come giudica il livello di pulizia e gradevolezza? \*

- ☐ Ottimo
- ☐ Buono
- ☐ Sufficiente
- ☐ Non sufficiente

D28.4 Come reputa le misure preventive anti-Covid applicate dalla struttura? \*

- ☐ Ottime
- ☐ Buone
- ☐ Sufficienti
- ☐ Non sufficienti

D28.5 - Durante le Sue ultime visite, come Le sono sembrate la cortesia e la disponibilità di chi l'ha assistita? \*

- ☐ Ottime
- ☐ Buone
- ☐ Soddisfacenti
- ☐ Non sufficienti

D28.6 - Durante le ultime visite quante volte Le sono state spiegate le cose in maniera a Lei comprensibile? \*

- ☐ Sempre
- ☐ Spesso
- ☐ Qualche volta
- ☐ Mai

D28.7 - Durante le Sue ultime visite in ambulatorio, quante volte ha avuto l'impressione di essere ascoltata con attenzione? \*

- ☐ Sempre
- ☐ Spesso
- ☐ Qualche volta
- ☐ Mai

Vorrei farLe ora qualche domanda in particolare sull'ULTIMA visita nella struttura che l'ha seguita più da vicino  
D28.8 - Quanto tempo è trascorso dalla prenotazione alla visita? \*

- ☐ Massimo un mese
- ☐ Tra uno e sei mesi
- ☐ Tra sei e 12 mesi
- ☐ Oltre un anno

D28.9 - Che tipo di visita era? \*

- ☐ Nuova visita o visita di controllo, riprogrammata per problemi legati alla pandemia Covid
- ☐ Nuova visita
- ☐ Visita di controllo

D28.10 - L'ultima volta che è stata visitata, quanto tempo ha impiegato per raggiungere la struttura? \*

- ☐ Meno di 15 minuti
- ☐ Tra 15 minuti e 30 minuti
- ☐ Tra 30 minuti e un'ora
- ☐ Più di un'ora

D28.11 - Quanto tempo ha dovuto attendere prima che si siano occupati di Lei? \*

- ☐ Meno di 15 minuti
- ☐ Tra 15 e 30 minuti
- ☐ Tra 30 minuti e un'ora
- ☐ Più di un'ora

D28.12 - Quanto tempo è durato complessivamente il Suo ultimo controllo dall'arrivo fino all'uscita dalla struttura ambulatoriale? \*

Specificare ore e/o minuti

---

D28.13 - Durante l'ultima visita, Le è stato dato un appuntamento ad una data precisa per la visita successiva? \*

- ☐ Sì
- ☐ No, mi è stato detto di chiamare in seguito per fissare un appuntamento
- ☐ No, mi è stato detto che mi telefoneranno per fissarmi la data
- ☐ No, non mi è stato fissato un appuntamento
- ☐ Non ricordo

D28.14 - Globalmente come giudica il servizio che Le è stato offerto negli ultimi 12 mesi? \*

- ☐
- ☐ Ottimo
- ☐ Buono
- ☐ Sufficiente
- ☐ Non sufficiente

D28.15 - Come giudica il livello di coordinamento tra tutti i servizi e i diversi professionisti che si occupano della Sua malattia? \*

- ☐ Ottimo
- ☐ Buono
- ☐ Sufficiente
- ☐ Non sufficiente

D28.16 - Qual è la fonte di informazioni che considera più utile per seguire e capire la Sua malattia? \*

- ☐ Il centro per l'endometriosi o il mio ginecologo
- ☐ Il medico di famiglia
- ☐ Le associazioni di malati
- ☐ Interpreto da me stessa tutti i documenti
- ☐ Siti-web
- ☐ Social networks
- ☐ Non dispongo di una fonte di informazione veramente efficace

D28.17 - Ritene che nell'ultimo anno in cui siamo stati colpiti dalla pandemia Covid, rispetto agli anni precedenti, ci siano stati cambiamenti nella gestione della sua malattia con riferimento ai seguenti aspetti? \*

|                                                | Aumentati | Diminuiti | Invariati |
|------------------------------------------------|-----------|-----------|-----------|
| Tempi di attesa dalla prenotazione alla visita |           |           |           |
| Tempi impiegati per raggiungere la struttura   |           |           |           |
| Tempi di attesa prima della visita             |           |           |           |

D28.18 - Ritene che nell'ultimo anno, in cui siamo stati colpiti dalla pandemia Covid, rispetto agli anni precedenti, ci siano stati cambiamenti nella gestione della Sua malattia con riferimento ai seguenti aspetti? \*

|                                                | Migliorata/i | Peggiorata/i | Invariata/i |
|------------------------------------------------|--------------|--------------|-------------|
| Orari della struttura                          |              |              |             |
| Accessibilità alla struttura                   |              |              |             |
| Pulizia e gradevolezza                         |              |              |             |
| Cortesia e disponibilità di chi l'ha assistita |              |              |             |
| Comprensibilità delle spiegazioni              |              |              |             |
| Attenzione nell'ascolto                        |              |              |             |

D28.19 - Ritene che i cambiamenti indicati possano essere attribuiti alla Covid? \*



- Sì
- No

D28.20 - Se no, a cosa?

---

Se negli ultimi 12 mesi non è stata seguita da alcuna struttura

D28.1a - Quanti mesi sono trascorsi dall'ultima visita? \*

---

D28.2a - Perché negli ultimi 12 mesi non si è fatta seguire da una struttura? \*

- ☐ Per scelta personale legata alla paura del contagio Covid
- ☐ Perché impossibilitata per motivi di salute legati alla Covid
- ☐ Ha già un appuntamento per una visita
- ☐ È stata seguita in telemedicina
- ☐ La visita è stata annullata/spostata per problematiche legate alla pandemia
- ☐ Altro: \_\_\_\_\_

D29 - In rapporto a tutti gli argomenti di cui abbiamo discusso, che cosa proporrebbe per migliorare l'assistenza delle donne malate di endometriosi della Sua Regione?

---



---

D30 - Soffre di altre patologie, oltre all'endometriosi? \*

- Sì
- No

D31 - Se ha risposto sì, se vuole può indicare quali

---

D32 - È vaccinata per la Covid-19? \*

- Sì
- No, non ancora
- No, non intende vaccinarsi

D33 - Come ha trovato questo questionario? \*

- Gruppo privato su Social Network
- Gruppo pubblico su Social Network
- Post sulla bacheca di un contatto Facebook
- Instagram
- Altro Social Network
- Servizi di messaggistica istantanea (WhatsApp, Telegram, Messenger, ecc)
- Associazione donne con endometriosi
- Email
- Altro \_\_\_\_\_

**STATO DI SALUTE SF36**

*Il questionario è concluso può cliccare su "invio". La ringraziamo per la collaborazione*
